# Supplementary material for: A Novel SELEX Based on Immobilizing Libraries Enables Screening of Saxitoxin Aptamers for BLI Aptasensor Applications
Source: MDPI journal article supplement (doi:10.3390/toxins14030228), 2022-03-21
Supplement: s1 [file s1]

# Supplementary Materials: A Novel SELEX Based on Immobilizing Libraries Enables Screening of Saxitoxin Aptamers for BLI Aptasensor Applications

Rong Zhou, Yun Gao, Chengfang Yang, Xiaojuan Zhang, Bo Hu, Luming Zhao, Han Guo, Mingjuan Sun, Lianghua Wang and Binghua Jiao

**Table S1.** Sequences of the random library and the G-quadruplex library

|                      |                                                                           |                    |
|----------------------|---------------------------------------------------------------------------|--------------------|
| N-PrimerA1           | GCCACACCCTGCCCTC                                                          | $K_d$ (M)          |
| N-PrimerA2           | 5' Biotin-GCCACACCCTGCCCTC                                                | /                  |
| N-PrimerB1           | GAGGACACAGACAGACAC                                                        | /                  |
| N-PrimerB2           | AAAAAAAAAAAAAAAAAAAAA-Spacer18-GAGGACACAGACAGACAC                         | /                  |
| Random Library       | GCCACACCCTGCCCTCNNNNNNNNNNNNNNNNNNNNNNNNNNNNNGTGTCTGTCTGTCTCCTC           | /                  |
| 1th Library          | 5' Biotin-GCCACACCCTGCCCTCNNNNNNNNNNNNNNNNNNNNNNNNNNNNNGTGTCTGTCTGTCTCCTC | $1.46 \times 10^3$ |
| 2th Library          | 5' Biotin-GCCACACCCTGCCCTCNNNNNNNNNNNNNNNNNNNNNNNNNNNNNGTGTCTGTCTGTCTCCTC | $2.11 \times 10^4$ |
| 3th Library          | 5' Biotin-GCCACACCCTGCCCTCNNNNNNNNNNNNNNNNNNNNNNNNNNNNNGTGTCTGTCTGTCTCCTC | $2.83 \times 10^5$ |
| 4th Library          | 5' Biotin-GCCACACCCTGCCCTCNNNNNNNNNNNNNNNNNNNNNNNNNNNNNGTGTCTGTCTGTCTCCTC | $1.62 \times 10^6$ |
| 5th Library          | 5' Biotin-GCCACACCCTGCCCTCNNNNNNNNNNNNNNNNNNNNNNNNNNNNNGTGTCTGTCTGTCTCCTC | $1.38 \times 10^6$ |
| 6th Library          | 5' Biotin-GCCACACCCTGCCCTCNNNNNNNNNNNNNNNNNNNNNNNNNNNNNGTGTCTGTCTGTCTCCTC | $9.08 \times 10^7$ |
| STX-R-10             | 5' Biotin- GCCACACCCTGCCCTCATCAAAATGCAAATCAAATAATAGTGTCTGTCTGTCTCCTC      | $1.18 \times 10^6$ |
| STX-R-11             | 5' Biotin- GCCACACCCTGCCCTCCACCCAGCAGTTTTTCATCCTCTAGTGTCTGTCTGTCTCCTC     | $3.05 \times 10^5$ |
| STX-R-37             | 5' Biotin- GCCACACCCTGCCCTCACTCGGAAACGAATGTAAATATTGTGTCTGTCTGTCTCCTC      | $2.30 \times 10^7$ |
| STX-R-40             | 5' Biotin- GCCACACCCTGCCCTCATACAAAAAATATTACGCAACTAGTGTCTGTCTGTCTCCTC      | $3.02 \times 10^7$ |
| STX-R-42             | 5' Biotin- GCCACACCCTGCCCTCCAACACCTGATATAGGATTCCGACGTGTCTGTCTGTCTCCTC     | $1.05 \times 10^6$ |
| STX-R-57             | 5' Biotin- GCCACACCCTGCCCTCAACCAGAAGTAAGAACTATCGCAGGTGTCTGTCTGTCTCCTC     | $5.80 \times 10^7$ |
| STX-R-59             | 5' Biotin- GCCACACCCTGCCCTCATATTGCAATAACCAAAACCACCCAGTGTCTGTCTGTCTCCTC    | $7.23 \times 10^7$ |
| STX-R-64             | 5' Biotin- GCCACACCCTGCCCTCAAAGATAGTCAATTAACATACACGGTGTCTGTCTGTCTCCTC     | $3.22 \times 10^7$ |
| STX-R-75             | 5' Biotin- GCCACACCCTGCCCTCTAGGTGCGTTTCATATGAACCTTCGTGTCTGTCTGTCTCCTC     | $2.09 \times 10^7$ |
| STX-R-78             | 5' Biotin- GCCACACCCTGCCCTCTACCAAAAGGAAAATATCAAAACAGTGTCTGTCTGTCTCCTC     | $2.33 \times 10^7$ |
| STX-R-80             | 5' Biotin- GCCACACCCTGCCCTCCACACGTAACGTAATAAGTGCACAGTGTCTGTCTGTCTCCTC     | $2.16 \times 10^7$ |
| 75a                  | 5' Biotin-TAGGTGCGTTTCATATGAACCTTCGTG                                     | $1.36 \times 10^7$ |
| 75b                  | 5' Biotin-GCCACACCCTGCCCTCTAGGTGCGTTTCATATGAACCTTCGTGT                    | $1.90 \times 10^7$ |
| 75c                  | 5' Biotin-TAGGTGCGTTTCATATGAACCTTC                                        | NB                 |
| G-quadruplex Library | GCCACACCCTGCCCTCNNNGGNNNNNGNNNNNGNNNNNGGGNNNGTGTCTGTCTGTCTCCTC            | /                  |
| 1th Library          | 5' Biotin-GCCACACCCTGCCCTCNNNGGNNNNNGNNNNNGNNNNNGGGNNNGTGTCTGTCTGTCTCCTC  | $1.01 \times 10^3$ |
| 2th Library          | 5' Biotin-GCCACACCCTGCCCTCNNNGGNNNNNGNNNNNGNNNNNGGGNNNGTGTCTGTCTGTCTCCTC  | $2.18 \times 10^5$ |
| 3th Library          | 5' Biotin-GCCACACCCTGCCCTCNNNGGNNNNNGNNNNNGNNNNNGGGNNNGTGTCTGTCTGTCTCCTC  | $1.47 \times 10^5$ |
| 4th Library          | 5' Biotin-GCCACACCCTGCCCTCNNNGGNNNNNGNNNNNGNNNNNGGGNNNGTGTCTGTCTGTCTCCTC  | $1.08 \times 10^6$ |
| 5th Library          | 5' Biotin-GCCACACCCTGCCCTCNNNGGNNNNNGNNNNNGNNNNNGGGNNNGTGTCTGTCTGTCTCCTC  | $9.87 \times 10^7$ |
| 6th Library          | 5' Biotin-GCCACACCCTGCCCTCNNNGGNNNNNGNNNNNGNNNNNGGGNNNGTGTCTGTCTGTCTCCTC  | $8.48 \times 10^7$ |
| STX-G4-12            | 5' Biotin-GCCACACCCTGCCCTCCACGGTTGTGATCTATGCGCAGGGTTGGTGTCTGTCTGTCTCCTC   | $5.22 \times 10^7$ |
| STX-G4-22            | 5' Biotin-GCCACACCCTGCCCTCCACGGAGGTGTAGGTTGTTACGGGTAAGTGTCTGTCTGTCTCCTC   | $9.89 \times 10^8$ |
| STX-G4-27            | 5' Biotin-GCCACACCCTGCCCTCCCGGAAGTGTGTTAAGCTCTGGGACGGTGTCTGTCTGTCTCCTC    | $5.60 \times 10^8$ |

|           |                                                                             |                    |
|-----------|-----------------------------------------------------------------------------|--------------------|
| STX-G4-45 | 5' Biotin-<br>GCCACACCCTGCCCTCGGGGCGCGGTTGATCGGAGAGGGCTAGTGTCTGTCTGTGTCCTC  | $4.26 \times 10^8$ |
| STX-G4-47 | 5' Biotin-<br>GCCACACCCTGCCCTCGCTGGTAGAGACCTCAGCCTGGGACCGTGTCTGTCTGTGTCCTC  | $7.58 \times 10^8$ |
| STX-G4-51 | 5' Biotin-<br>GCCACACCCTGCCCTCACAGGCTCCGCTAGACGGACTGGGTTGGTGTCTGTCTGTGTCCTC | $9.72 \times 10^8$ |
| STX-G4-58 | 5' Biotin-<br>GCCACACCCTGCCCTCCCCGGTACCGAGACTCGCTTAGGGCGTGTGTCTGTCTGTGTCCTC | $1.01 \times 10^6$ |
| STX-G4-60 | 5' Biotin-GCCACACCCTGCCCTCCTCGGTAATGTCCCATGTTACGGGTTAGTGTCTGTCTGTGTCCTC     | $9.50 \times 10^8$ |
| STX-G4-62 | 5' Biotin-<br>GCCACACCCTGCCCTCTGCGGGCTTGAGTACGGAATAGGGCCTGTGTCTGTCTGTGTCCTC | $6.39 \times 10^8$ |
| STX-G4-67 | 5' Biotin-<br>GCCACACCCTGCCCTCGATGGCACCGGTGAGGGTGTGGGAATGTGTCTGTCTGTGTCCTC  | $1.15 \times 10^7$ |
| 45a       | 5' Biotin-ACACCCTGCCCTCGGGGCGCGGTTGATCGGAGAGGGCTAGTGT                       | $4.16 \times 10^8$ |
| 45b       | 5' Biotin-CTCGGGGCGCGGTTGATCGGAGAGGGCTAGTGTCTGTCTGTGT                       | $3.83 \times 10^8$ |
| 45c       | 5' Biotin-GGGGGCGCGGTTGATCGGAGAGGGCTA                                       | NB                 |
| 45d       | 5' Biotin-CGCGGTTGATCGGAGAGGGCTA                                            | NB                 |
| 45e       | 5' Biotin-CTCGGGGCGCGGTTGATCGGAGAGGGCTA                                     | $2.12 \times 10^8$ |
| 45f       | 5' Biotin-CTCGGGCCCGCGGTTGATCGGAGAGGGCTA                                    | NB                 |
| 45g       | 5' Biotin-CTCGGGGCGCCCTTGATCGGAGAGGGCTA                                     | NB                 |
| 45h       | 5' Biotin-CTCGGGGCGCGGTTGATCCAGAGGGCTA                                      | NB                 |
| 45i       | 5' Biotin-CTCGGGGCGCGGTTGATCGGAGACCGCTA                                     | NB                 |
| 45e-1     | 5' Biotin-CTCGGGGCGCGGTTGATCGGAGAGGG                                        | $1.90 \times 10^8$ |
| 45e-2     | 5' Biotin-CTCGGGGCGCGGTTGATCGGAGAGG                                         | $3.06 \times 10^8$ |
| 45e-3     | 5' Biotin-CGGGGCGCGGTTGATCGGAGAGG                                           | $2.68 \times 10^7$ |

NB: No Binding

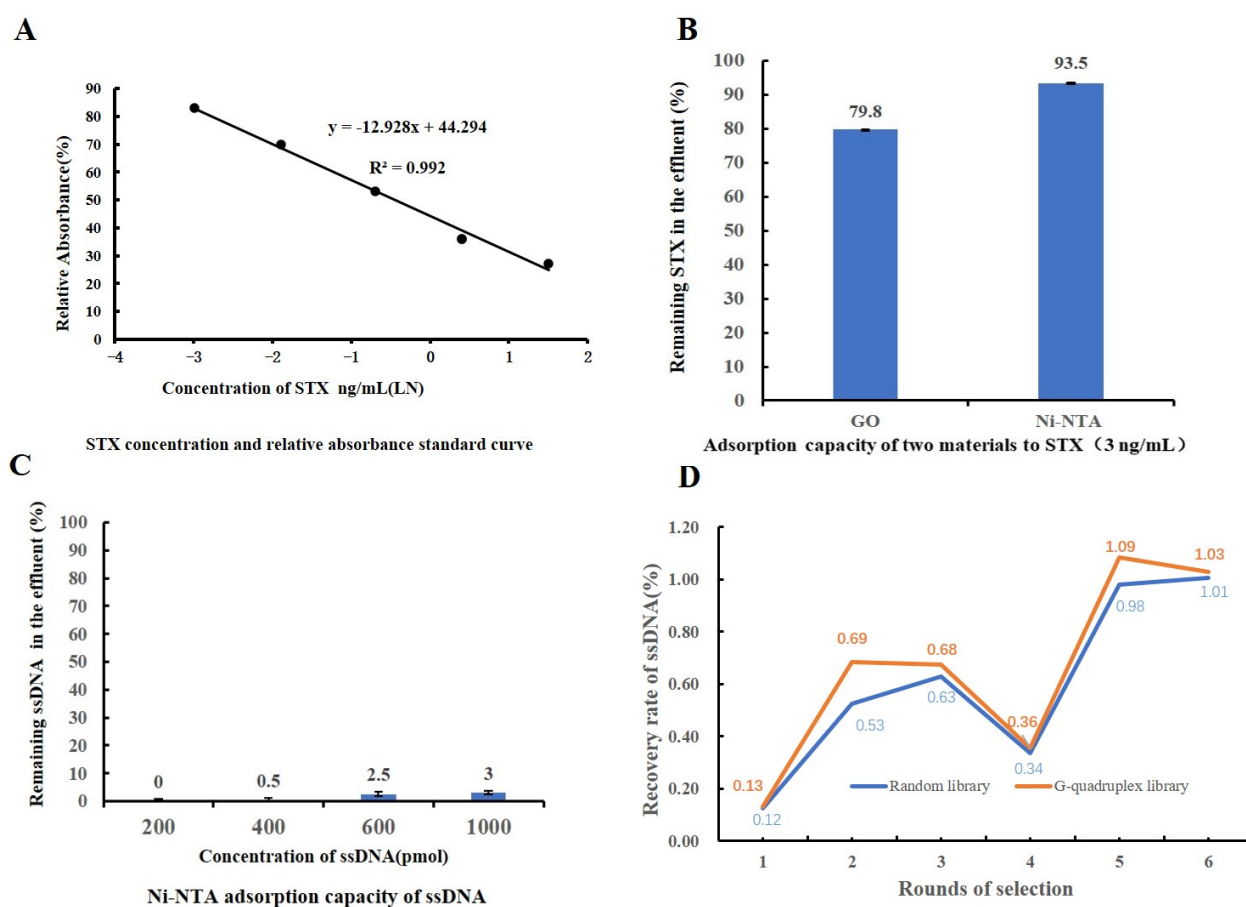

**Figure S1.** (A) STX concentration and relative absorbance standard curve. (B) The mixed solution of STX and ssDNA was incubated with the GO and Ni-NTA column, the recovery rate of STX (3 ng/mL) in the effluent through GO and Ni-NTA column is 79.8% and 93.5%, respectively. (C) Adsorption capacity of Ni-NTA column (2 ml kit) to ssDNA. (D) Recovery ratio of ssDNA during IMC-SELEX.

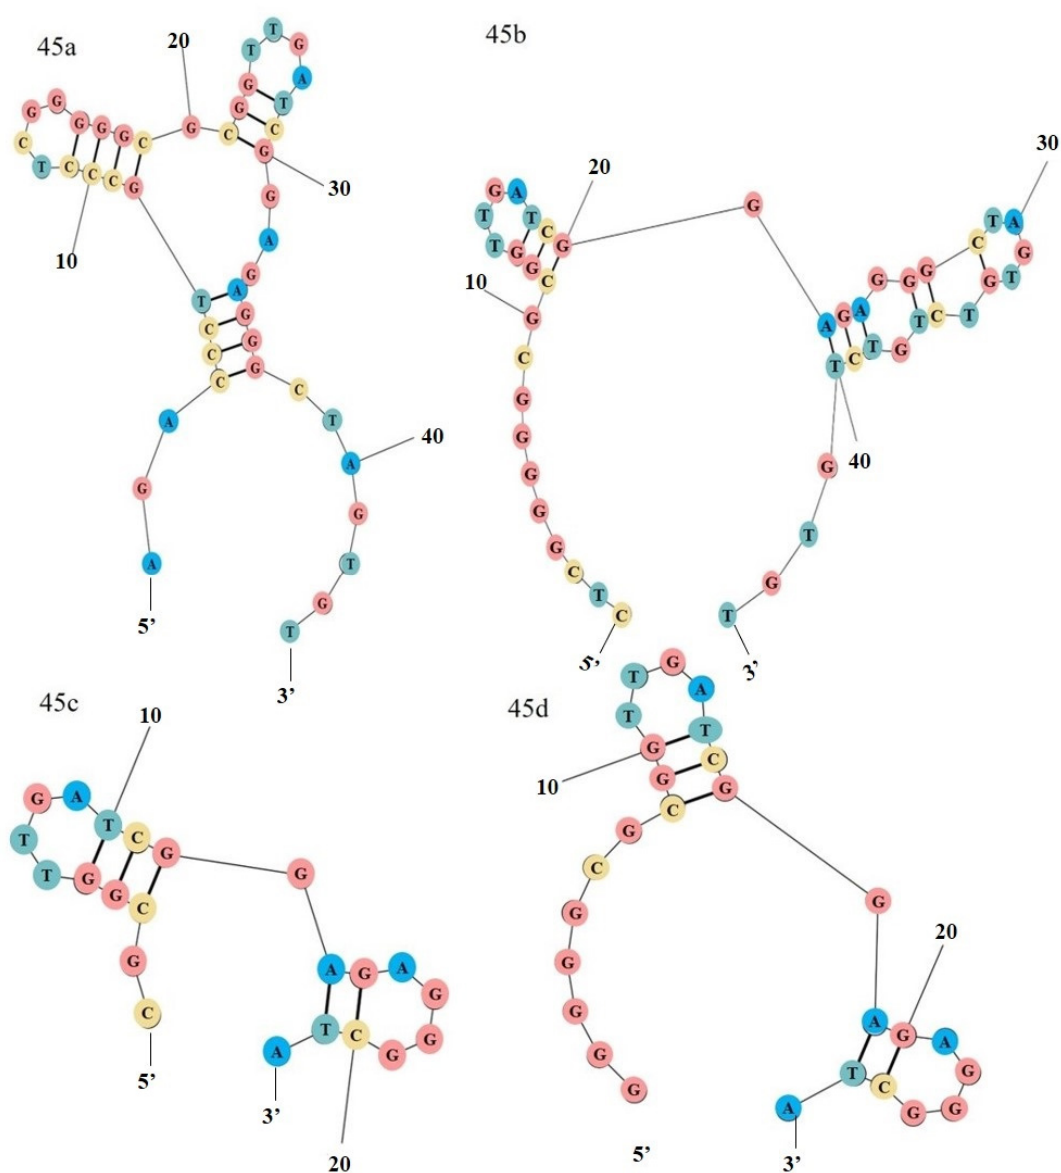

**Figure S2.** Secondary structure prediction of optimized sequences of STX-G4-45.

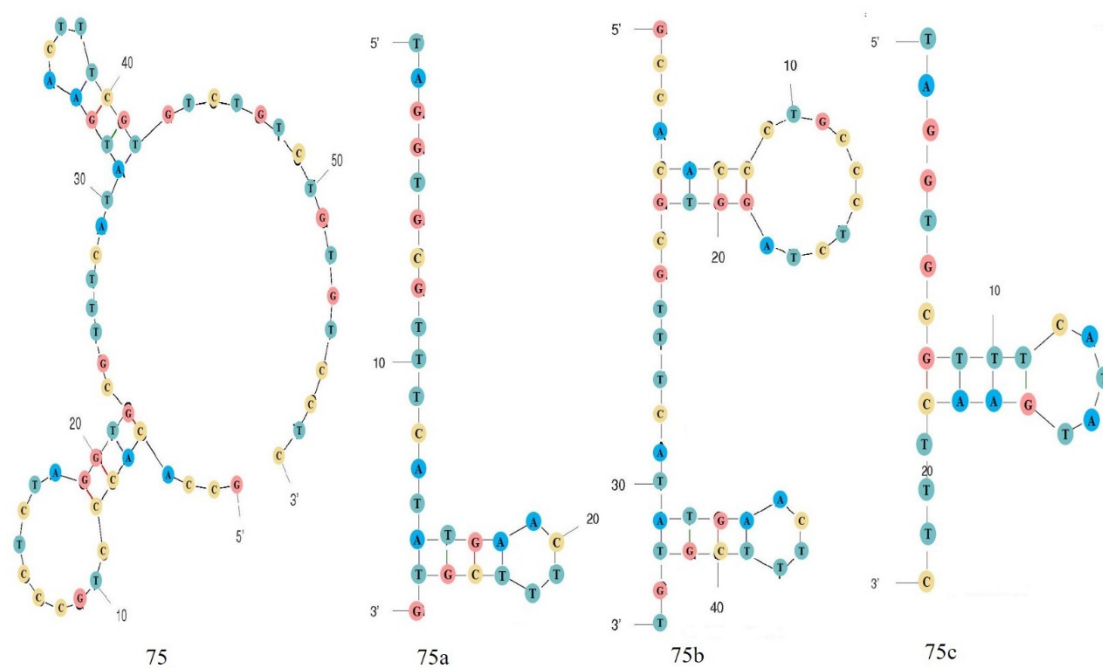

**Figure S3.** Secondary structure prediction of aptamer 75, 75a, 75b, and 75c.

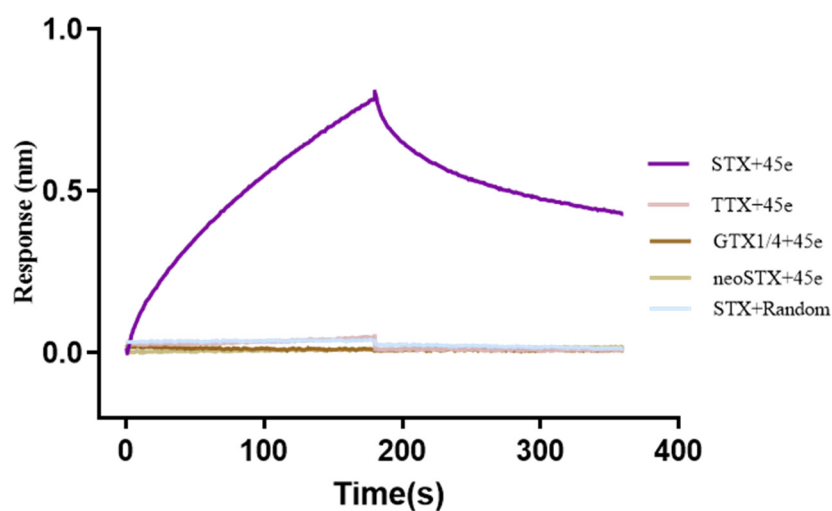

**Figure S4.** Characterization of affinity and specificity of aptamer 45e for STX. The purple line represents the interaction curve of aptamer 45e with STX. The blue line represents the interaction curve of a random sequence with STX. The pink, brown, yellow lines represent the interaction curves of aptamer 45e with TTX, GTX1/4, neoSTX. All toxins are diluted to 5  $\mu$ M with seawater, respectively.

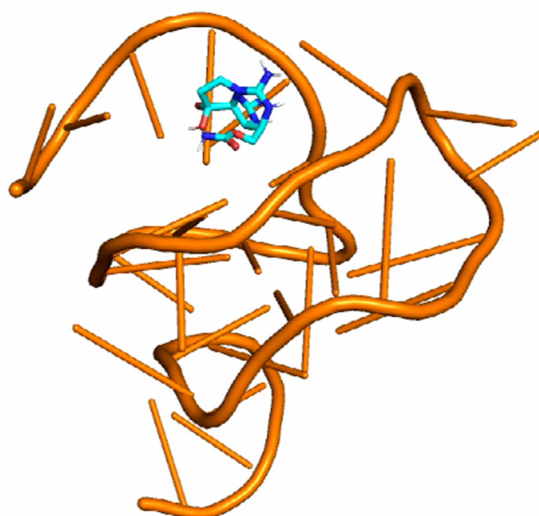

**Figure S5.** The final stable complex of 45e and STX.

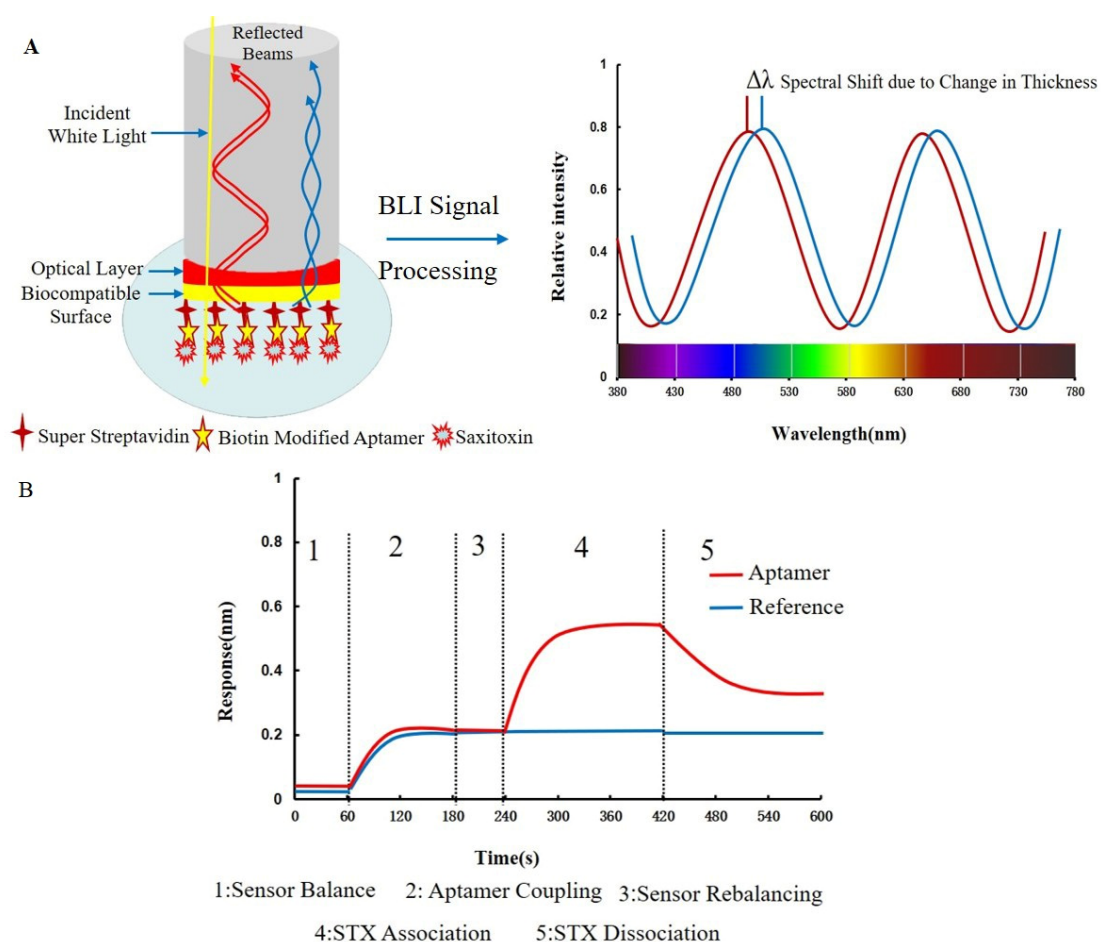

**Figure S6.** (A) The principle of the aptasensor for detection of STX. (B) Schematic of the working progress of the aptasensor.
